# Supplementary material for: Megafauna of the UKSRL exploration contract area and eastern Clarion-Clipperton Zone in the Pacific Ocean: Annelida, Arthropoda, Bryozoa, Chordata, Ctenophora, Mollusca
Source: Biodivers Data J. 2017 Aug 14;(5):e14598. doi: 10.3897/BDJ.5.e14598 (PMC5565845; doi:10.3897/BDJ.5.e14598)
Supplement: Supplementary material 1 — Concise table of megafaunal morphospecies locations [file bdj-05-e14598-s001.xlsx]

## Sheet: Sheet1
Phylum	Morphospecies	Latitude	Longitude	Depth	Location Description
Annelida	cf. Polychaeta sp.	13.8637	-116.546	4035	UK-1 Stratum A
Annelida	cf. Polynoidae sp.	12.5849	-116.71	4222	UK-1 Stratum B
Annelida	cf. Sabellidae sp. 1	13.8633	-116.546	4029	UK-1 Stratum A
Annelida	cf. Sabellidae sp. 1	13.6794	-114.411	3934	Site EPIRB
Annelida	cf. Sabelllidae sp. 2	13.6794	-114.414	3950	Site EPIRB
Annelida	cf. Serpulidae sp. 1	13.8561	-116.548	4024	UK-1 Stratum A
Annelida	cf. Serpulidae sp. 2	13.8498	-116.646	4109	UK-1 Stratum A
Annelida	cf. Serpulidae sp. 3	13.6791	-114.41	3934	Site EPIRB
Annelida	cf. Acrocirridae sp.	13.6785	-114.407	3915	Site EPIRB
Arthropoda	cf. Eurythenes sp. 1	12.5532	-116.539	4312	UK-1 Stratum B
Arthropoda	cf. Eurythenes sp. 1	13.7615	-116.466	4170	UK-1 Stratum A
Arthropoda	Eurythenes magellanicus	13.7615	-116.466	4170	UK-1 Stratum A
Arthropoda	cf. Podoceridae sp.	13.7603	-116.468	4073	UK-1 Stratum A
Arthropoda	Hemipenaeus cf. spinidorsalis	13.8661	-116.555	4046	UK-1 Stratum A
Arthropoda	Hemipenaeus cf. spinidorsalis	12.5684	-116.733	4210	UK-1 Stratum B
Arthropoda	Hemipenaeus cf. spinidorsalis	12.5103	-116.639	4252	UK-1 Stratum B
Arthropoda	Hemipenaeus cf. spinidorsalis	12.5532	-116.539	4312	UK-1 Stratum B
Arthropoda	Hemipenaeus cf. spinidorsalis	12.3836	-116.491	4201	UK-1 Stratum B
Arthropoda	Cerataspis cf. monstrosus	13.8661	-116.555	4046	UK-1 Stratum A
Arthropoda	cf. Glyphocrangon sp.	12.5842	-116.705	4222	UK-1 Stratum B
Arthropoda	cf. Munidopsis sp.	12.4353	-116.553	3605	UK-1 Stratum B
Arthropoda	cf. Nematocarcinus sp.	13.8629	116.548	4032	UK-1 Stratum A
Arthropoda	cf. Nematocarcinus sp.	13.8583	-116.547	4021	UK-1 Stratum A
Arthropoda	Hymenopenaeus nereus	13.8885	-116.682	4156	UK-1 Stratum A
Arthropoda	Hymenopenaeus cf. nereus	13.7604	-116.468	4071	UK-1 Stratum A
Arthropoda	Hymenopenaeus cf. nereus	13.7604	-116.468	4070	UK-1 Stratum A
Arthropoda	Hymenopenaeus cf. nereus	12.5667	-116.708	4267	UK-1 Stratum B
Arthropoda	cf. Bathystylodactylus sp.	13.6786	-114.407	3922	Site EPIRB
Arthropoda	cf. Munnopsidae sp.	13.7603	-116.468	4070	UK-1 Stratum A
Arthropoda	cf. Munnopsidae sp.	13.85	-116.646	4110	UK-1 Stratum A
Arthropoda	cf. Neoscalpellum sp.	13.8646	-116.548	4025	UK-1 Stratum A
Bryozoa	cf. Smithsonius sp.	13.8646	-116.548	4024	UK-1 Stratum A
Bryozoa	cf. Smithsonius sp.	13.8498	-116.6457	4119	UK-1 Stratum A
Bryozoa	cf. Smithsonius sp.	13.6794	-114.413	3944	Site EPIRB
Bryozoa	cf. Smithsonius sp.	13.6797	-114.415	3953	Site EPIRB
Bryozoa	cf. Notoplites sp.	13.8484	-116.657	4110	UK-1 Stratum A
Bryozoa	cf. Notoplites sp.	13.6793	-114.407	3914	Site EPIRB
Bryozoa	cf. Notoplites sp.	13.8502	-116.646	4110	UK-1 Stratum A
Bryozoa	cf. Notoplites sp.	13.8647	-116.548	4026	UK-1 Stratum A
Bryozoa	cf. Columnella sp.	13.85	-116.646	4110	UK-1 Stratum A
Bryozoa	cf. Lepralielloidea sp.	13.8484	-116.657	4110	UK-1 Stratum A
Chordata	cf. Phlebobranchia sp. 1	13.8636	-116.549	4033	UK-1 Stratum A
Chordata	cf. Phlebobranchia sp. 2	13.8518	-116.645	4101	UK-1 Stratum A
Chordata	cf. Dicopia sp.	13.6789	-114.409	3927	Site EPIRB
Chordata	cf. Dicopia sp.	13.9666	-116.557	4063	UK-1 Stratum A
Chordata	cf. Megalodicopia sp.	13.6787	-114.407	3920	Site EPIRB
Chordata	cf. Megalodicopia sp.	12.497	-116.637	4242	UK-1 Stratum B
Chordata	cf. Situla sp.	13.9671	-116.559	4057	UK-1 Stratum A
Chordata	cf. Situla sp.	12.5896	-116.709	4215	UK-1 Stratum B
Chordata	cf. Situla sp.	13.8527	-116.644	4097	UK-1 Stratum A
Chordata	cf. Actinopterygii sp.	12.5887	-116.717	4223	UK-1 Stratum B
Chordata	Histiobranchus cf. bathybius	12.5035	-116.644	4249	UK-1 Stratum B
Chordata	Histiobranchus cf. bathybius	12.4526	-116.649	4263	UK-1 Stratum B
Chordata	Bathysaurus cf. mollis	13.8618	-116.548	4028	UK-1 Stratum A
Chordata	Bathysaurus cf. mollis	12.5787	-116.725	4226	UK-1 Stratum B
Chordata	Ipnops cf. meadi	13.8637	-116.546	4028	UK-1 Stratum A
Chordata	Ipnops cf. meadi	13.8605	-116.548	4027	UK-1 Stratum A
Chordata	cf. Coryphaenoides sp.	13.9628	-116.551	4064	UK-1 Stratum A
Chordata	cf. Coryphaenoides sp.	12.5877	-116.718	4221	UK-1 Stratum B
Chordata	cf. Coryphaenoides yaquinae	13.8885	-116.682	4156	UK-1 Stratum A
Chordata	cf. Coryphaenoides armatus	12.4435	116.207	4152	UK-1 Stratum A
Chordata	cf. Coryphaenoides sp.	12.5127	-116.622	4275	UK-1 Stratum B
Chordata	cf. Halosauridae sp.	12.585	-116.702	4224	UK-1 Stratum B
Chordata	cf. Halosauridae sp.	12.5823	-116.711	4213	UK-1 Stratum B
Chordata	cf. Ophidiidae sp. 1	12.5389	-116.605	4234	UK-1 Stratum B
Chordata	cf. Ophidiidae sp. 1	13.8643	-116.549	4026	UK-1 Stratum A
Chordata	cf. Ophidiidae sp. 2	12.4353	-116.553	3605	UK-1 Stratum B
Chordata	cf. Ophidiidae sp. 3	12.4848	-116.655	4248	UK-1 Stratum B
Chordata	cf. Ophidiidae sp. 4	12.4957	-116.65	4251	UK-1 Stratum B
Chordata	cf. Ophidiidae sp. 4	12.5726	-116.734	4211	UK-1 Stratum B
Chordata	cf. Ophidiidae sp. 5	12.3681	-116.519	4161	UK-1 Stratum B
Chordata	cf. Ophidiidae sp. 5	12.5793	-116.72	4229	UK-1 Stratum B
Chordata	Barathrites cf. iris	12.5126	-116.622	4212	UK-1 Stratum B
Chordata	Bassozetus cf. nasus	13.7603	-116.468	4070	UK-1 Stratum A
Chordata	Bassozetus cf. nasus	12.5778	-116.724	4225	UK-1 Stratum B
Chordata	Bassozetus cf. nasus	12.5532	-116.539	4312	UK-1 Stratum B
Chordata	Bathyonus cf. caudalis	12.5126	-116.622	4212	UK-1 Stratum B
Chordata	Bathyonus cf. caudalis	13.6794	-114.414	3956	Site EPIRB
Chordata	cf. Zoarcidae sp. 1	12.4526	-116.649	4236	UK-1 Stratum B
Chordata	cf. Zoarcidae sp. 2	12.4353	-116.553	3605	UK-1 Stratum B
Chordata	Pachycara cf. nazca	13.7605	-116.468	4070	UK-1 Stratum A
Chordata	Pachycara cf. nazca	13.6796	-114.415	3948	Site EPIRB
Chordata	Pachycara nazca	13.9022	-116.574	4106	UK-1 Stratum A
Chordata	Pachycara nazca	13.9022	-116.574	4106	UK-1 Stratum A
Chordata	Pachycara cf. nazca	12.4526	-116.649	4263	UK-1 Stratum B
Ctenophora	cf. Mertensiidae sp.	12.4998	-116.64	4244	UK-1 Stratum B
Ctenophora	cf. Lobata sp. 1	12.4962	-116.636	4235	UK-1 Stratum B
Ctenophora	cf. Lobata sp. 2	12.495	-116.65	4253	UK-1 Stratum B
Ctenophora	cf. Lobata sp. 3	12.5794	-116.687	4225	UK-1 Stratum B
Ctenophora	cf. Lobata sp. 3	12.5797	-116.727	4224	UK-1 Stratum B
Ctenophora	cf. Lobata sp. 3	12.5815	-116.722	4221	UK-1 Stratum B
Ctenophora	cf. Lobata sp. 3	12.5793	-116.724	4226	UK-1 Stratum B
Ctenophora	Lampocteis cf. cruentiventer	12.4967	-116.63	4210	UK-1 Stratum B
Mollusca	cf. Bivalvia sp.	13.6794	-114.415	3952	Site EPIRB
Mollusca	cf. Bivalvia sp.	13.6789	-114.409	3927	Site EPIRB
Mollusca	cf. Bivalvia sp.	13.6794	-114.413	3945	Site EPIRB
Mollusca	cf. Cirroteuthidae sp.	12.5819	-116.721	4225	UK-1 Stratum B
Mollusca	cf. Cirroteuthidae sp.	12.5341	-116.604	4233	UK-1 Stratum B
Mollusca	cf. Cirroteuthidae sp.	12.4932	-116.652	4254	UK-1 Stratum B
Mollusca	cf. Cirroteuthidae sp.	12.5854	-116.719	4223	UK-1 Stratum B
Mollusca	cf. Muusoctopus sp.	12.5788	-116.687	4225	UK-1 Stratum B
Mollusca	cf. Grimpoteuthis sp.	12.4983	-116.645	4249	UK-1 Stratum B
Mollusca	cf. Grimpoteuthis sp.	12.5012	-116.65	4253	UK-1 Stratum B
Mollusca	cf. Grimpoteuthis sp.	12.572	-116.735	4209	UK-1 Stratum B
Mollusca	cf. Grimpoteuthis sp.	12.5879	-116.717	4224	UK-1 Stratum B
